# Supplementary material
Source: PubMed Central journal article supplement (PMC8862399)
Supplement: 40265_2022_1672_MOESM1_ESM.pdf [file 40265_2022_1672_MOESM1_ESM.pdf]

## Ocrelizumab: Adis Evaluation

### Clinical Considerations

- Limits relapses, inflammatory activity and disease progression in patients with RMS
- Delays clinical and MRI progression in patients with PPMS
- Clinical benefits sustained over long-term treatment
- Most common adverse events include infusion-related reactions and infections (mostly of mild to moderate severity)

### Plain Language Summary

#### *Background and rationale*

- Multiple sclerosis (MS) is a chronic, immune-mediated, neurodegenerative disease of the CNS
- In most patients, it starts as relapsing-remitting MS (RRMS), which involves exacerbations of neurological symptoms (i.e. relapses) followed by periods of remission
- In the less common primary progressive MS (PPMS), disability accrues steadily from disease onset
- It is now understood that B cells play key roles in MS pathophysiology
- Ocrelizumab (Ocrevus®), a monoclonal antibody that selectively depletes CD20+ B cells, is approved for treating adults with RMS and PPMS in various countries worldwide

#### *Clinical findings*

- Ocrelizumab reduces relapse rates and indicators of disease activity in patients with RMS, and delays the worsening of disability in patients with RMS and PPMS
- Of convenience to patients, ocrelizumab is intravenously administered every six months and can be infused rapidly (over ≈ 2 hours) without its safety being substantially altered

#### *Conclusion*

Ocrelizumab is a generally well-tolerated and highly effective treatment option for RMS and constitutes the first approved pharmacotherapy for PPMS

This plain language summary represents the opinions of the author. For a full list of declarations, including funding and author disclosure statements, please see the full text online. © Springer Nature Switzerland AG 2022.
